# Supplementary material for: Digital Online Anaesthesia Patient Informed Consent before Elective Diagnostic Procedures or Surgery: Recent Practice in Children—An Exploratory ESAIC Survey (2021)
Source: MDPI journal article supplement (doi:10.3390/jcm11030502), 2022-01-19
Supplement: s1 [file s1]

## Supplementary Material

**Table S1.** Number of responses.

| Country of Employment? n (%) |            |                     |          |
|------------------------------|------------|---------------------|----------|
| Albania                      | 3 (0.3)    | Liechtenstein       | 1 (0.1)  |
| Austria                      | 32 (3.4)   | Lithuania           | 8 (0.9)  |
| Belarus                      | 2 (0.2)    | Luxembourg          | 4 (0.4)  |
| Belgium                      | 27 (2.9)   | Malta               | 6 (0.6)  |
| Bosnia and Herzegovina       | 5 (0.5)    | Moldova             | 3 (0.3)  |
| Bulgaria                     | 8 (0.9)    | Monaco              | 1 (0.1)  |
| Croatia                      | 26 (2.8)   | Netherlands         | 50 (5.4) |
| Cyprus                       | 4 (0.4)    | Macedonia           | 3 (0.3)  |
| Czechia                      | 10 (1.1)   | Norway              | 8 (0.9)  |
| Denmark                      | 11 (1.2)   | Poland              | 19 (2.0) |
| Estonia                      | 4 (0.4)    | Portugal            | 56 (6.0) |
| Finland                      | 12 (1.3)   | Romania             | 31 (3.3) |
| France                       | 24 (2.6)   | Russia              | 12 (1.3) |
| Georgia                      | 2 (0.2)    | Serbia              | 14 (1.5) |
| Germany                      | 132 (14.2) | Slovakia            | 8 (0.9)  |
| Greece                       | 45 (4.8)   | Slovenia            | 14 (1.5) |
| Hungary                      | 8 (0.9)    | Spain               | 73 (7.8) |
| Iceland                      | 1 (0.1)    | Sweden              | 43 (4.6) |
| Ireland                      | 18 (1.9)   | Switzerland         | 65 (7.0) |
| Israel                       | 6 (0.6)    | Turkey              | 23 (2.5) |
| Italy                        | 40 (4.3)   | Ukraine             | 7 (0.8)  |
| Kazakhstan                   | 2 (0.2)    | United Kingdom (UK) | 44 (4.7) |
| Kosovo                       | 3 (0.3)    | Uzbekistan          | 2 (0.2)  |
| Latvia                       | 10 (1.1)   |                     |          |

**Table S2.** Questionnaire items.

| Overall                                                                                                                                                                                                               | n (%)      |
|-----------------------------------------------------------------------------------------------------------------------------------------------------------------------------------------------------------------------|------------|
| Do you need to obtain written Informed consent for elective surgery due to legal requirements from both parents or just from one (simple procedures, low risk patients)?                                              |            |
| <i>Always both</i>                                                                                                                                                                                                    | 92 (14.2)  |
| <i>Different</i>                                                                                                                                                                                                      | 53 (8.2)   |
| <i>Just the one, who is present</i>                                                                                                                                                                                   | 502 (77.6) |
| Do you need to obtain written Informed consent for elective surgery due to legal requirements from both parents or just from one (complex procedures, higher risk patients)?                                          |            |
| <i>Always both parents</i>                                                                                                                                                                                            | 167 (25.7) |
| <i>Different</i>                                                                                                                                                                                                      | 68 (10.5)  |
| <i>Just the one, who is present</i>                                                                                                                                                                                   | 415 (63.8) |
| Do you know if it is legally allowed to obtain informed consent from the parent/caregiver via Internet or telephone?                                                                                                  |            |
| <i>Different</i>                                                                                                                                                                                                      | 63 (9.8)   |
| <i>No</i>                                                                                                                                                                                                             | 432 (67.3) |
| <i>Yes</i>                                                                                                                                                                                                            | 147 (22.9) |
| When ensuring a certain guideline, which may include i.e. specific appointment (time and date) for the interview, secure data protected online service, asking if there is a relaxed environment without distraction, |            |

---

|                                                                                                                                                         |            |
|---------------------------------------------------------------------------------------------------------------------------------------------------------|------------|
| parents' explicit agreement in online or telephone interview. Would this be an alternative to personal face-to-face meetings?                           |            |
| <i>Different</i>                                                                                                                                        | 52 (7.6)   |
| <i>No</i>                                                                                                                                               | 222 (32.3) |
| <i>Yes</i>                                                                                                                                              | 414 (60.2) |
| In case of personal presence of the parent/caregiver do you routinely check the identity or legal responsibility of the parent/caregiver (i.e. ID card) |            |
| <i>Different</i>                                                                                                                                        | 29 (4.5)   |
| <i>No</i>                                                                                                                                               | 423 (65.6) |
| <i>Yes</i>                                                                                                                                              | 193 (29.9) |
| Do you think it is necessary to verify the identity of the parent/guardian (i.e. ID card)                                                               |            |
| <i>Different</i>                                                                                                                                        | 49 (7.6)   |
| <i>No</i>                                                                                                                                               | 234 (36.3) |
| <i>Yes</i>                                                                                                                                              | 362 (56.1) |
| What are your major concerns about online or telephone interviews?                                                                                      |            |
| <i>Lack of contact</i>                                                                                                                                  | 632 (26.8) |
| <i>Can't observe behavior</i>                                                                                                                           | 504 (21.4) |
| <i>No relationship</i>                                                                                                                                  | 396 (21.4) |
| <i>No confidence (missing doctor-patient relationship)</i>                                                                                              | 264 (16.8) |
| <i>Legal requirements</i>                                                                                                                               | 268 (11.3) |
| <i>Unsure if illegal</i>                                                                                                                                | 291 (12.3) |
| What could be a major advantage of online/telephone interviews?                                                                                         |            |
| <i>Less stressful</i>                                                                                                                                   | 308 (23.1) |
| <i>Less waiting</i>                                                                                                                                     | 470 (35.3) |
| <i>Standardized questionnaires</i>                                                                                                                      | 224 (16.8) |
| <i>More efficient than face-to-face</i>                                                                                                                 | 327 (24.6) |

---
